# Supplementary material
Source: PubMed Central journal article supplement (PMC5404950)
Supplement: NIHMS832516-supplement-Supp_Fig_S1-S2.pdf [file NIHMS832516-supplement-Supp_Fig_S1-S2.pdf]

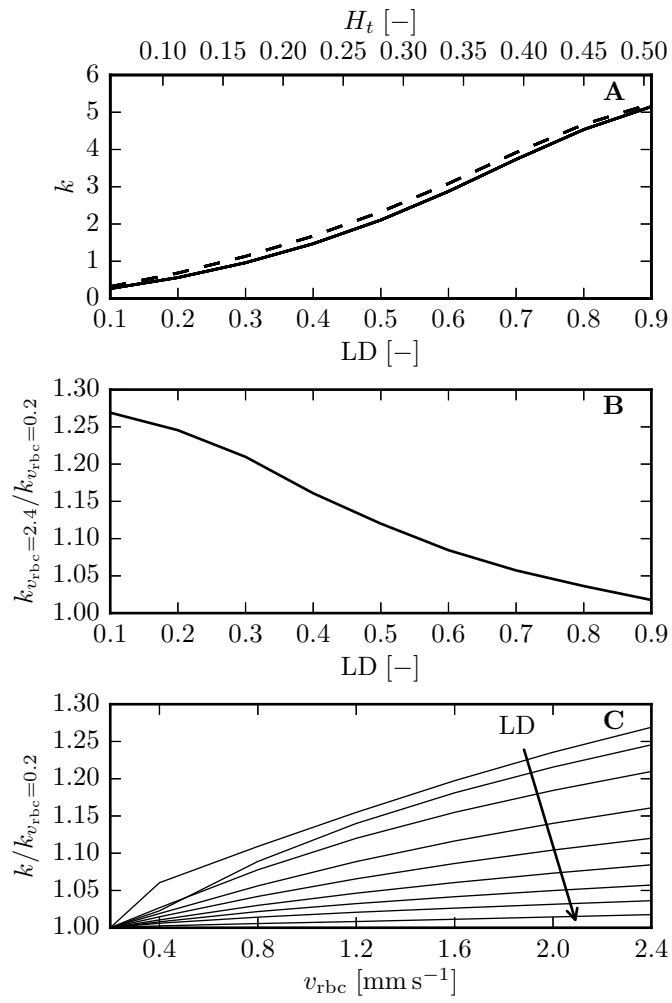

Supplementary Figure 1: Mass transfer coefficient as a function of LD and RBC velocity. See legend of Figure 6.

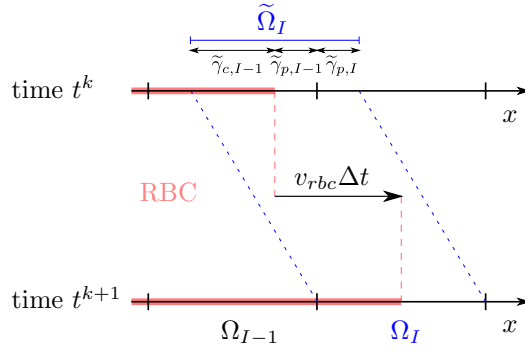

Supplementary Figure 2: Schematic for the improved scheme for the advection term in Eq. (21). The RBC domain  $\Omega_{rbc}$  in pale red is shifted by  $v_{rbc} \Delta t$  between times  $t^k$  and  $t^{k+1}$ . The volume fractions  $\tilde{\gamma}_{c,I-1}$ ,  $\tilde{\gamma}_{p,I-1}$  and  $\tilde{\gamma}_{p,I}$  are defined in Appendix B.
